# Supplementary material for: Unveiling the Secrets of the Stressed Hippocampus: Exploring Proteomic Changes and Neurobiology of Posttraumatic Stress Disorder
Source: MDPI journal article supplement (doi:10.3390/cells12182290), 2023-09-15
Supplement: s1 [file s1]

## SUPPLEMENTARY INFORMATION

### **Unveiling the Secrets of the Stressed Hippocampus: Exploring Proteomic Changes and Neurobiology of Posttraumatic Stress Disorder**

Andrea Nieto-Quero, María Inmaculada Infantes-López, Emma Zambrana-Infantes, Patricia Chaves-Peña, Ana L Gavito, Jose Munoz-Martin, Sara Tabbai, Javier Márquez, Fernando Rodríguez de Fonseca, María Inmaculada García-Fernández, Luis J Santín, Carmen Pedraza \*, Margarita Pérez-Martín \*

\*Corresponding author

#### Supplementary Information includes:

- Corticosterone measurement
- Information extracted from MCODE (1 hour post-stress)
- Information extracted from MCODE (24 hours post-stress)
- Western Blot
- Immunolabeling assays
- Quantification and morphological analysis for Iba1+, DCX+ and BrdU/DCX+
- Basal locomotor and exploratory activity measured by OFT
- WIRS did not affect the parameters assessed by the EPM
- Figure S1: Complementary behavioural results for the OFT and EPM tests
- Figure S2: Western blot membranes

## **Corticosterone measurement**

Basal and post-stress blood samples, from the lateral tail vein, were collected in EDTA tubes at 9:00 am and 3:00 pm. The final samples were collected from the right atrium of each animal at the time of sacrifice. The blood sample tubes were centrifuged (10 min, 6000 rpm, 4°C), and the supernatant (plasma for basal and post-stress samples and serum for final samples) was stored at -80 °C. Plasma and serum corticosterone levels were determined using a commercially available Enzyme Immunoassay Kit, sensitivity ca. 27.0 pg/ml, following the manufacturer's instructions (Assay Designs/Stressgen, Ann Arbor, Michigan, USA).

### Information extracted from MCODE (1 hour post-stress)

In the network for the set of underexpressed and overexpressed proteins, after 1 h of the stressor exposure, MCODE identifies a total of 9 clusters, among them 6 are related to underexpression (Table S1), and 3 to overexpression (Table S2). For each cluster we have information on the number of nodes, the number of interactions, and the cluster score (a higher score indicates stronger connections between nodes). This information can be consulted in the following.

**Table S1.** Information on the clusters that form the network for the 1-hour context after exposure to the stressor, and that are associated with significantly underexpressed proteins.

| No. Cluster                 | 1    | 2    | 3    | 4   | 5   | 6   |
|-----------------------------|------|------|------|-----|-----|-----|
| No. of nodes in the cluster | 58   | 21   | 10   | 7   | 4   | 3   |
| No. of interactions         | 1159 | 206  | 45   | 21  | 6   | 3   |
| Cluster score               | 40.7 | 20.6 | 10.0 | 7.0 | 4.0 | 3.0 |

**Table S2.** Information on the clusters that form the network for the context of 1 hour after stressor exposure, and which are associated with significantly overexpressed proteins.

| No. Cluster                 | 7    | 8    | 9   |
|-----------------------------|------|------|-----|
| No. of nodes in the cluster | 79   | 15   | 6   |
| No. of interactions         | 3081 | 80   | 15  |
| Cluster score               | 79.0 | 11.4 | 6.0 |

These 9 clusters are formed, specifically, by the proteins encoded by the following genes:

| <b>Cluster 1</b> | <i>Nxf7</i>     | <i>Nup155</i>  | <i>Nup188</i> | <i>Nup88</i>   | <b>Cluster 2</b> |
|------------------|-----------------|----------------|---------------|----------------|------------------|
| <i>Cenpe</i>     | <i>Nup107</i>   | <i>Dsn1</i>    | <i>Nup98</i>  | <i>Nup160</i>  | <i>Atp5g1</i>    |
| <i>Ipo8</i>      | <i>Gle1</i>     | <i>Cenpf</i>   | <i>Rae1</i>   | <i>Mad2l1</i>  | <i>Atp5f1</i>    |
| <i>Nup153</i>    | <i>Aaas</i>     | <i>Nup43</i>   | <i>Bub1b</i>  | <i>Bub3</i>    | <i>Atp5o</i>     |
| <i>Nup50</i>     | <i>Seh1l</i>    | <i>Nup133</i>  | <i>Ranbp2</i> | <i>Rangap1</i> | <i>Ndufs7</i>    |
| <i>Nde1</i>      | <i>Ahctf1</i>   | <i>Sec13</i>   | <i>Smc3</i>   | <i>Cenpc1</i>  | <i>Atp5a1</i>    |
| <i>Ccnb1</i>     | <i>Nup62</i>    | <i>mCG_491</i> | <i>Nup210</i> | <i>Sgol1</i>   | <i>Atp5g3</i>    |
| <i>Nup93</i>     | <i>Ndel1</i>    | 83             | <i>Nup37</i>  | <i>Nup85</i>   | <i>Gm10221</i>   |
| <i>Pom121</i>    | <i>Ndc80</i>    | <i>Nxf2</i>    | <i>Nup11</i>  | <i>Zwilch</i>  | <i>Atp5h</i>     |
| <i>Ndc1</i>      | <i>Cenpl</i>    | <i>Nxf1</i>    | <i>Nup54</i>  | <i>Nuf2</i>    | <i>mt-Atp6</i>   |
| <i>Tpr</i>       | <i>Bub1</i>     | <i>Ube2i</i>   | <i>Sgol2</i>  | <i>Ska2</i>    | <i>Atp5s</i>     |
| <i>Xpol</i>      | <i>Pafah1b1</i> | <i>Incenp</i>  | <i>Nup205</i> | <i>Nup214</i>  | <i>Atp5g2</i>    |

|                         |                         |                 |                |                         |                         |
|-------------------------|-------------------------|-----------------|----------------|-------------------------|-------------------------|
| <i>Atp5c1</i>           | <i>Dlg4</i>             | <i>Ube2e1</i>   | <i>Stub1</i>   | <i>Uba1</i>             | <i>Efnb3</i>            |
| <i>Atp5k</i>            | <i>Grik2</i>            | <i>Pja1</i>     | <i>Trim69</i>  | <i>Ube2u</i>            | <i>Efnb1</i>            |
| <i>Uqcr11</i>           | <i>Dlg3</i>             | <i>Fbxl15</i>   | <i>Traf7</i>   | <i>Ube2v2</i>           | <i>Efn2</i>             |
| <i>Atp5e</i>            | <i>Grik5</i>            | <i>Ube2z</i>    | <i>Trip12</i>  | <i>Uba3</i>             | <i>Efna3</i>            |
| <i>Atp5d</i>            | <i>Grik4</i>            | <i>Ube2s</i>    | <i>Ube2b</i>   | <i>Pja2</i>             | <i>Fyn</i>              |
| <i>Atp5j2</i>           | <b><u>Cluster 5</u></b> | <i>Wwp1</i>     | <i>Ube2j1</i>  | <i>Ube2h</i>            | <i>Pak2</i>             |
| <i>Atp5j</i>            | <i>Pikfyve</i>          | <i>Cul7</i>     | <i>Trim63</i>  | <i>Rnf25</i>            | <i>Efna5</i>            |
| <i>Gm10175</i>          | <i>Fig4</i>             | <i>Ube2r2</i>   | <i>Mgrn1</i>   | <i>Ube2e3</i>           | <i>Efnb2</i>            |
| <i>Gm5426</i>           | <i>Mcoln1</i>           | <i>Herc6</i>    | <i>Ube2d3</i>  | <i>Ube2q1</i>           | <i>Pak3</i>             |
| <i>Atp5b</i>            | <i>Vac14</i>            | <i>Trim21</i>   | <i>Skp1a</i>   | <i>Park2</i>            | <i>Nck2</i>             |
| <b><u>Cluster 3</u></b> | <b><u>Cluster 6</u></b> | <i>Atg7</i>     | <i>Ube2a</i>   | <i>Rnf41</i>            | <i>Efna1</i>            |
| <i>Pkp4</i>             | <i>Cntn6</i>            | <i>Fbxo40</i>   | <i>Itch</i>    | <i>Fbxo32</i>           | <i>Ephb3</i>            |
| <i>Dsp</i>              | <i>Ptprg</i>            | <i>Trim71</i>   | <i>Ubox5</i>   | <i>Trim41</i>           | <i>Rac1</i>             |
| <i>Dsg2</i>             | <i>Chl1</i>             | <i>Ubr2</i>     | <i>Ube2d2a</i> | <i>Hecw2</i>            | <b><u>Cluster 9</u></b> |
| <i>Dsc3</i>             | <b><u>Cluster 7</u></b> | <i>Ubr1</i>     | <i>Fbxl19</i>  | <i>Ubc</i>              | <i>Dag1</i>             |
| <i>Dsg4</i>             | <i>Uba5</i>             | <i>Ube2o</i>    | <i>Nedd4</i>   | <i>Ube2e2</i>           | <i>Pomk</i>             |
| <i>Dsg1a</i>            | <i>Hectd2</i>           | <i>Hace1</i>    | <i>Uba7</i>    | <i>Ube2m</i>            | <i>Pomgnt2</i>          |
| <i>Jup</i>              | <i>Fbxl3</i>            | <i>Ube3a</i>    | <i>Smurf1</i>  | <i>Ube2q2</i>           | <i>Pomt1</i>            |
| <i>Dsc1</i>             | <i>Ube2g1</i>           | <i>Rlim</i>     | <i>Ube2j2</i>  | <i>Ube2l6</i>           | <i>Pomt2</i>            |
| <i>Dsg3</i>             | <i>Cdc34-ps</i>         | <i>Uba6</i>     | <i>Ube2c</i>   | <i>Cul3</i>             | <i>B3galnt2</i>         |
| <i>Dsc2</i>             | <i>Cdc34</i>            | <i>Cul1</i>     | <i>Ube2d1</i>  | <i>Huwe1</i>            |                         |
| <b><u>Cluster 4</u></b> | <i>Nedd4l</i>           | <i>Ln timer</i> | <i>Ube4a</i>   | <b><u>Cluster 8</u></b> |                         |
| <i>Grik3</i>            | <i>Are1</i>             | <i>Ube2g2</i>   | <i>Rbx1</i>    | <i>Efna4</i>            |                         |
| <i>Dlg1</i>             | <i>Smurf2</i>           | <i>Rbck1</i>    | <i>Ube2k</i>   | <i>Epha10</i>           |                         |

### Information extracted from MCODE (24 hours post-stress)

In the network for the set of underexpressed and overexpressed proteins, after 24 hours of stressor exposure, MCODE identifies a total of 18 clusters, of which 9 are related to underexpression (Table S3), and 9 to overexpression (Table S4). For each cluster we have information on the number of nodes, the number of interactions, and the cluster score. This information can be found in the following.

**Table S3.** Information on the clusters forming the network for the 24-hour context after stressor exposure, and which are associated with the significantly underexpressed proteins.

| No. Cluster                 | 1    | 2    | 3    | 4   | 5   | 6   | 7   | 8   | 9   |
|-----------------------------|------|------|------|-----|-----|-----|-----|-----|-----|
| No. of nodes in the cluster | 31   | 20   | 11   | 9   | 9   | 5   | 3   | 3   | 3   |
| No. of interactions         | 465  | 189  | 55   | 35  | 33  | 7   | 3   | 3   | 3   |
| Cluster score               | 31.0 | 19.9 | 11.0 | 8.8 | 8.3 | 3.5 | 3.0 | 3.0 | 3.0 |

**Table S4.** Information on the clusters that form the network for the 24-hour context after stressor exposure, and which are associated with significantly overexpressed proteins.

| No. Cluster                 | 10   | 11   | 12   | 13  | 14  | 15  | 16  | 17  | 18  |
|-----------------------------|------|------|------|-----|-----|-----|-----|-----|-----|
| No. of nodes in the cluster | 43   | 11   | 14   | 9   | 4   | 4   | 4   | 3   | 3   |
| No. of interactions         | 896  | 55   | 69   | 36  | 6   | 6   | 6   | 3   | 3   |
| Cluster score               | 42.7 | 11.0 | 10.6 | 9.0 | 4.0 | 4.0 | 4.0 | 3.0 | 3.0 |

These 18 clusters are made up of proteins encoded by the following genes:

|                         |                  |                         |               |                         |                         |
|-------------------------|------------------|-------------------------|---------------|-------------------------|-------------------------|
| <b><u>Cluster 1</u></b> | <i>Igfbp1</i>    | <i>Serpinc1</i>         | <i>Ctdp1</i>  | <i>Cdk9</i>             | <i>Cnot1</i>            |
| <i>Knlg1</i>            | <i>ApoE</i>      | <i>Apoa1</i>            | <i>Supt4a</i> | <i>Polr2c</i>           | <i>Cnot4</i>            |
| <i>Il6</i>              | <i>Serpind1</i>  | <i>Afp</i>              | <i>Tcea1</i>  | <i>Polr2g</i>           | <i>Cnot11</i>           |
| <i>Cst3</i>             | <i>Serpina1e</i> | <i>App</i>              | <i>Gtf2f2</i> | <i>Cdk7</i>             | <i>Cnot3</i>            |
| <i>Ahsg</i>             | <i>Pcsk9</i>     | <i>Proc</i>             | <i>Polr2d</i> | <i>Supt5</i>            | <i>Cnot6</i>            |
| <i>Fn1</i>              | <i>Itih2</i>     | <i>Spp2</i>             | <i>Ccnt1</i>  | <b><u>Cluster 3</u></b> | <b><u>Cluster 4</u></b> |
| <i>C3</i>               | <i>C4b</i>       | <i>Alb</i>              | <i>Polr2b</i> | <i>Cnot7</i>            | <i>Pltp</i>             |
| <i>Knlg2</i>            | <i>Serpina1d</i> | <i>Serpina1b</i>        | <i>Gtf2f1</i> | <i>Cnot6l</i>           | <i>Pon1</i>             |
| <i>Fgg</i>              | <i>Apoa2</i>     | <b><u>Cluster 2</u></b> | <i>Cdk12</i>  | <i>Rqcd1</i>            | <i>Scarb1</i>           |
| <i>Fga</i>              | <i>Trf</i>       | <i>Ccnk</i>             | <i>Ctr9</i>   | <i>Cnot2</i>            | <i>Lpl</i>              |
| <i>Serpina1a</i>        | <i>Apoa5</i>     | <i>Supt6</i>            | <i>Polr2k</i> | <i>Cnot8</i>            | <i>Lcat</i>             |
| <i>Apob</i>             | <i>Cp</i>        | <i>Polr2f</i>           | <i>Iws1</i>   | <i>Cnot10</i>           | <i>Mtp</i>              |

|                          |                |                          |                          |
|--------------------------|----------------|--------------------------|--------------------------|
| <i>Apoc2</i>             | <i>Rps27l</i>  | <i>Rps19</i>             | <i>Rubcn</i>             |
| <i>Ldlr</i>              | <i>Eif3d</i>   | <i>Eif4b</i>             | <i>Pik3r4</i>            |
| <i>Abca1</i>             | <i>Rps23</i>   | <i>Rps14</i>             | <i>Gabarapl1</i>         |
| <b><u>Cluster 5</u></b>  | <i>Rps8</i>    | <b><u>Cluster 11</u></b> | <i>Map1lc3a</i>          |
| <i>Pi4ka</i>             | <i>Rps28</i>   | <i>Ccdc22</i>            | <b><u>Cluster 14</u></b> |
| <i>Sacm1l</i>            | <i>Eif3a</i>   | <i>Commd9</i>            | <i>Pet112</i>            |
| <i>Pi4kb</i>             | <i>Rps7</i>    | <i>Commd8</i>            | <i>Nars</i>              |
| <i>Pip5k1b</i>           | <i>Rps3</i>    | <i>Commd6</i>            | <i>Qrs1l</i>             |
| <i>Pik3c3</i>            | <i>Rps15a</i>  | <i>Commd3</i>            | <i>Nars2</i>             |
| <i>Pip5k1c</i>           | <i>Eif3h</i>   | <i>Commd7</i>            | <b><u>Cluster 15</u></b> |
| <i>Pikfyve</i>           | <i>Rps3a1</i>  | <i>Commd4</i>            | <i>Ppp4c</i>             |
| <i>Pip5k1a</i>           | <i>Eif3m</i>   | <i>Commd1</i>            | <i>Smek2</i>             |
| <i>Pi4k2a</i>            | <i>Rps16</i>   | <i>Ccdc93</i>            | <i>Smek1</i>             |
| <b><u>Cluster 6</u></b>  | <i>Rps21</i>   | <i>Commd10</i>           | <i>Ppp4r2</i>            |
| <i>Apoc3</i>             | <i>Eif3c</i>   | <i>Commd2</i>            | <b><u>Cluster 16</u></b> |
| <i>A2m</i>               | <i>Eif2s3x</i> | <b><u>Cluster 12</u></b> | <i>Dhcr24</i>            |
| <i>Apom</i>              | <i>Eif3f</i>   | <i>Smad2</i>             | <i>Lss</i>               |
| <i>Hp</i>                | <i>Eif3i</i>   | <i>Foxh1</i>             | <i>Sc5d</i>              |
| <i>Apoh</i>              | <i>Eif3g</i>   | <i>Smad4</i>             | <i>Dhcr7</i>             |
| <b><u>Cluster 7</u></b>  | <i>Rps9</i>    | <i>Acvr1c</i>            | <b><u>Cluster 17</u></b> |
| <i>Hnrnpu</i>            | <i>Gnb2l1</i>  | <i>Acvr1b</i>            | <i>Cdk2</i>              |
| <i>Snrbp</i>             | <i>Rps17</i>   | <i>Zfyve9</i>            | <i>Ccnt1</i>             |
| <i>Ybx1</i>              | <i>Eif3k</i>   | <i>Tgfb1</i>             | <i>Cdk9</i>              |
| <b><u>Cluster 8</u></b>  | <i>Eif3l</i>   | <i>Ski</i>               | <b><u>Cluster 18</u></b> |
| <i>Hbb-bh1</i>           | <i>Fau</i>     | <i>Acvr2a</i>            | <i>Orai2</i>             |
| <i>Hba-a2</i>            | <i>Eif2s1</i>  | <i>Smurf2</i>            | <i>Stim1</i>             |
| <i>Hbb-y</i>             | <i>Rps25</i>   | <i>Smad3</i>             | <i>Stim2</i>             |
| <b><u>Cluster 9</u></b>  | <i>Eif3j1</i>  | <i>Tgfb1</i>             |                          |
| <i>Skp2</i>              | <i>Eif3b</i>   | <i>Acvr2b</i>            |                          |
| <i>Ubac1</i>             | <i>Eif3e</i>   | <i>Smad7</i>             |                          |
| <i>Rnf123</i>            | <i>Rps6</i>    | <b><u>Cluster 13</u></b> |                          |
| <b><u>Cluster 10</u></b> | <i>Rps13</i>   | <i>Map1lc3b</i>          |                          |
| <i>Rps18</i>             | <i>Eif4a1</i>  | <i>Gabarap</i>           |                          |
| <i>Rps5</i>              | <i>Rps27a</i>  | <i>Becn1</i>             |                          |
| <i>Rps11</i>             | <i>Eif3j2</i>  | <i>Uvrage</i>            |                          |
| <i>Eif2s3y</i>           | <i>Rps27</i>   | <i>Pik3c3</i>            |                          |

## Western Blot

The hippocampi were homogenised in RIPA lysis buffer with protease and phosphatase inhibitors cocktail. The protein concentration of each sample was determined by the Bradford method (Bio-Rad protein assay, Bio-Rad, California, United States). Protein extracts ( $2.3 \times 10^3 \mu\text{g/ml}$ ) were separated by 4-12% Criterion™ gel for protein electrophoresis (Bio-Rad, Madrid, Spain), and electrically transferred to nitrocellulose membranes (Bio-Rad, Madrid, Spain) using the Trans-Blot® Turbo™ transfer system (Bio-Rad, California, USA). The membranes were blocked with 2% BSA for 1 hour. Subsequently, the membranes were incubated overnight with the primary antibodies: mouse anti- $\beta$ -actin (1:1000; Thermo Scientific, ref: MA1-140); mouse anti-Smad3 (1:200; Santa Cruz, ref: sc-101154); rabbit anti-GLUR7 (1:200; Thermo Scientific, ref: PA5-77435); rabbit anti-Pi4k2a (1:1000; Thermo Scientific, ref: PA5-15275); rabbit anti-UBE2H (1:500; Thermo Scientific, ref: PA5-96648). After washing with TBS-T, they were incubated for 1 hour with the secondary antibodies: anti-mouse-HRP conjugated (1:10000; Promega, ref: W4021); anti-rabbit-HRP conjugated (1:10000; Promega, ref: W4011). Immunocomplexes were visualised using a peroxidase chemiluminescence substrate (Clarity Max™ Western ECL Substrate, Bio-Rad Laboratories, Cressier, Switzerland) and immunoreactivity was detected using the ChemiDoc XRS system (Bio-Rad Laboratories, Cressier, Switzerland). Finally, protein quantification was performed with ImageJ software (Rasband, W.S., ImageJ, National Institutes of Health, Bethesda, Maryland, USA). Each protein band was normalised to the  $\beta$ -actin levels of the same membrane.

## Immunolabeling assays

Once the mice, of experimental block III, were anesthetized with sodium pentobarbital 200 mg/ml, the brains were collected after the sacrifice with PBS (pH = 7.4) and 4% paraformaldehyde. After 48 h of post-fixation in 4% paraformaldehyde, brains were stored at -15°C in cryoprotectant solution. Brains were sectioned on 40 µm coronal sections using a vibratome. Thus, for the set of slices used, there is approximately 240 µm between the closest sections rostro-caudally. First, endogenous peroxidase was inactivated by 10% methanol and 10% H<sub>2</sub>O<sub>2</sub> in PBS for 45 minutes in the dark. Incubation in saturating solution for 45 minutes. Next, primary antibodies: rabbit anti-Iba1 (1:500; Wako, ref: 019-19741) and goat anti-DCX (1:200; Santa Cruz Biotechnology, ref: sc-8066) were used for a overnight incubation at 4°C. Followed by the correspondent biotinylated secondary antibodies: anti-rabbit (1:1000; Dako, ref: E0432) and anti-goat (1:1000; Dako, ref: E0466) for 1 hour and 30 minutes. This was followed by incubation with ExtrAvidin peroxidase (1:1000; Sigma-Aldrich, ref: E2886) for 1 hour in the dark. And finally, a revealed with 0.05% diaminobenzidine (DAB) and 0.03% H<sub>2</sub>O<sub>2</sub> for up to 5 minutes in the dark. After each reagent and antibody treatment, three 10-minute with shaking washes with PBS were performed.

Otherwise, for a concrete study of new neurons proliferation, double positive cells were labelled following an immunofluorescence protocol. The tissue was treated with 2 N HCl at 37°C for 15 minutes. Then a saturation phase for 45 minutes was performed. Then primary antibodies: rabbit anti-DCX (1:600; Abcam, ref: ab18723) and rat anti-BrdU (1:1000; Accurate Chemical, ref: OBT0030) were used for a overnight incubation at 4°C. Followed by the correspondent secondary antibodies: Alexa Fluor 568 anti-rabbit (1:1000; Invitrogen, ref: A10042) and Alexa Fluor 488 anti-rat (1:1000; Invitrogen, ref: A21208) for 1 hour and 30 minutes in the dark. And finally, a treatment with DAPI 1X was used as nuclear marker. After each reagent and antibody treatment, three 10-minute with shaking washes with PBS were performed.



## **Quantification and morphological analysis for Iba1+, DCX+ and BrdU/DCX+**

For the analysis of the microglia, tissue sections immunostained with anti-Iba1 containing the dentate gyrus (DG; Fig. 5H) (a mean of 6 sections by each animal) were scanned with a 20x objective using VS-ASW software linked to an Olympus VS120 virtual microscope (Olympus, Tokyo, Japan). Through subsequent image analysis with the free software program Fiji (Rasband, W.S., ImageJ, National Institutes of Health, Bethesda, Maryland, United States), each microglia was quantified and analysed. Morphometric parameters of the cell soma (area, perimeter, circularity and roundness) and distribution (density, distance and regularity index) were considered (Davis et al., 2017). Where each parameter refers to the following:

- Area: surface occupied by the soma ( $\mu\text{m}^2$ ).
- Perimeter: length of the soma contour ( $\mu\text{m}$ ).
- Circularity: parameter derived from the area and perimeter. Its value lies in the interval [0, 1], with 0 corresponding to a completely elongated soma, and 1 corresponding to a completely circular soma.
- Roundness: parameter derived from the area and major length of the soma. Its value lies in the interval [0, 1], where 0 is indicative if it contains very angular regions and 1 if it contains completely rounded regions.
- Density: number of Iba1+ cells quantified in relation to the selected area of the DG.
- Distance: space between the microglia analysed with respect to the microglia closest to it. The centre of the soma of each microglia is taken as the points to plot this distance. ( $\mu\text{m}$ ).
- Regularity Index (RI): provides information on the uniformity of the distribution of microglia. This parameter is calculated as follows: Distance/ Standard deviation of the distances.

For DCX+ cells of DG (Fig. 5K, L) were quantified using a 100x objective of the Olympus BX53 microscope (Olympus, Tokyo, Japan) and equipped with the newCAST™ computerized system with Autodisector™ (Visiopharm, Hoersholm, Denmark). A mean of 6 sections by animal were quantified. To determine the density of the different types of neurons according to their degree of maturity, the following classification was made based on morphology: type A, proliferative cells or more immature cells without prolongations; type B, immature neurons with one prolongation; and type C, neurons with at least one branch in some of their prolongations extend into

the molecular layer (Brown et al., 2003) (Fig. 5L). The results obtained by this method provided us with a density value for the following formula:

$$N_V = \frac{\Sigma(Q - d)}{\Sigma(h \times a_{fra})} ,$$

where  $N_V$  refers to cell density,  $\Sigma Q - d$  is the total number of positive cells for a specific type of labelling, and  $\Sigma(h \times a_{fra})$  is the quantification volume, where  $h$  is the depth of the optical dissector and  $a_{fra}$  is the area of the optical dissector.

Furthermore, to determine the possible new neurons (BrdU/DCX +) in a group, approximately 110 BrdU+ cells were quantified by animal using a confocal microscope (Stellaris 8, Leica, Wetzlar, Germany).

### **Basal locomotor and exploratory activity measured by OFT**

The analysis revealed no significant differences between groups in spatio-temporal parameters: distances travelled in periphery ( $t(26)=-0.27$ ,  $p>0.05$ ), centre ( $t(26)=-0.09$ ,  $p>0.05$ ) and total ( $t(26)=-0.27$ ,  $p>0.05$ ) of the arena (Fig. 2A); time in the periphery ( $t(26)=-0.56$ ,  $p>0.05$ ) and centre ( $t(26)=-0.40$ ,  $p>0.05$ ) (Fig. 2B); and velocity ( $t(26)=-0.15$ , Fig. 2C). No significant differences were observed either, respect to the control group, regarding frequency and time (Fig. S1A, B in this document of Supplementary Information) of the behaviours evaluated: wall rearing (frequency:  $t(26)=1.82$ ,  $p>0.05$ ; time:  $t(26)=1.68$ ,  $p>0.05$ ), rearing (frequency:  $t(26)=-0.30$ ,  $p>0.05$ ; time:  $t(26)=-0.24$ ,  $p>0.05$ ), and grooming (frequency:  $t(26)=-0.66$ ,  $p>0.05$ ; time:  $t(26)=-0.84$ ,  $p>0.05$ ).

## **WIRS did not affect the parameters assessed by the EPM**

Regarding the spatiotemporal parameters, no significant differences between treatments were observed: anxiety index ( $t(26)=0.88$ ,  $p>0.05$ ; Fig. 2E), time spent (centre:  $t(26)=0.91$ ,  $p>0.05$ ; open arms:  $t(26)=-0.42$ ,  $p>0.05$ ; closed arms:  $t(26)=0.91$ ,  $p>0.05$ ; Fig. 2F), frequency of entry (centre:  $t(26)=-0.52$ ,  $p>0.05$ ; open arms:  $t(26)=-0.96$ ,  $p>0.05$ ; closed arms:  $t(26)=-0.18$ ,  $p>0.05$ ; Fig. 2G), and the time/frequency ratio on open arms ( $t(26)=0.06$ ,  $p>0.05$ ; Fig. 2H). WIRS also did not change the ethological parameters assessed: wall rearing (frequency:  $t(26)=-0.53$ ,  $p>0.05$ ; time:  $t(26)=-0.50$ ,  $p>0.05$ ), rearing (frequency:  $t(26)=0.22$ ,  $p>0.05$ ; time:  $t(26)=-0.06$ ,  $p>0.05$ ), head dipping (frequency:  $t(26)=-0.41$ ,  $p>0.05$ ; time:  $t(26)=-0.36$ ,  $p>0.05$ ) and grooming (frequency:  $t(26)=0.17$ ,  $p>0.05$ ; time:  $t(26)=0.31$ ,  $p>0.05$ ) (Fig. S1C, D in this document of Supplementary Information).

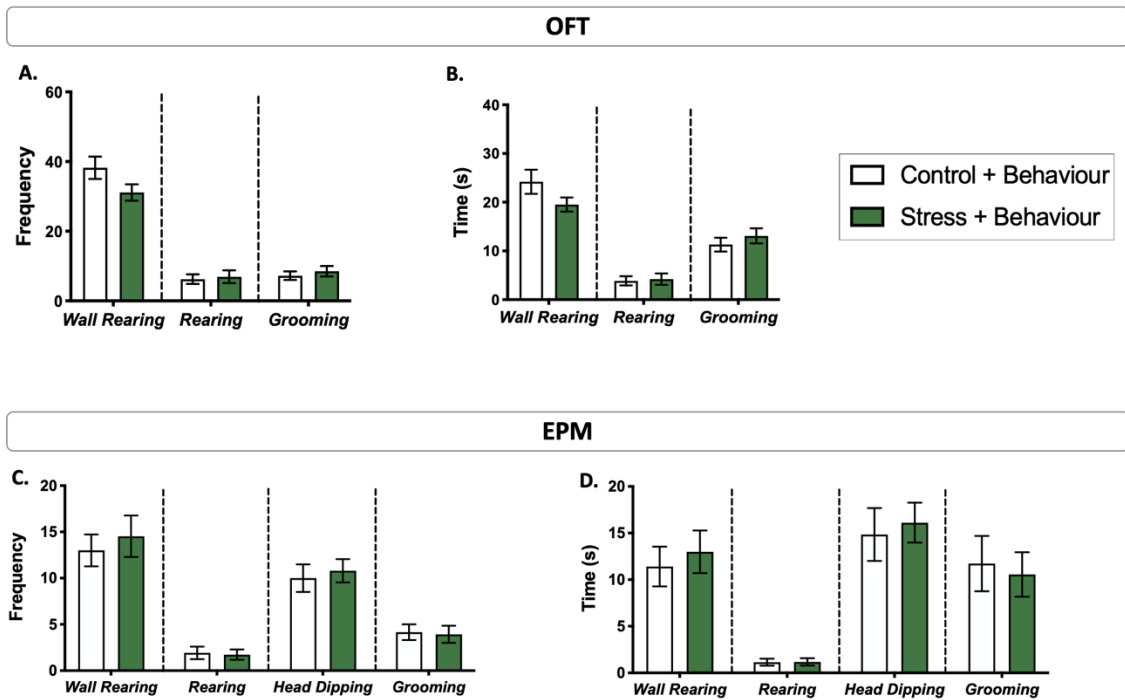

**Figure S1.** Complementary behavioural results for the OFT and EPM tests. This figure shows the frequency and time of ethological behaviours in the OFT (**A** and **B**, respectively) and EPM (**C** and **D**, respectively).

**A.  $\beta$ -Actin**

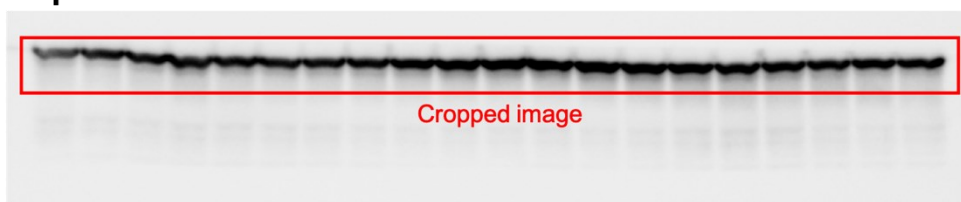

**B. GLUR7**

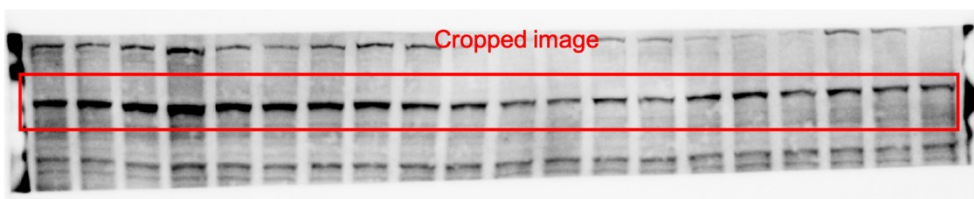

**C. Pi4k2a**

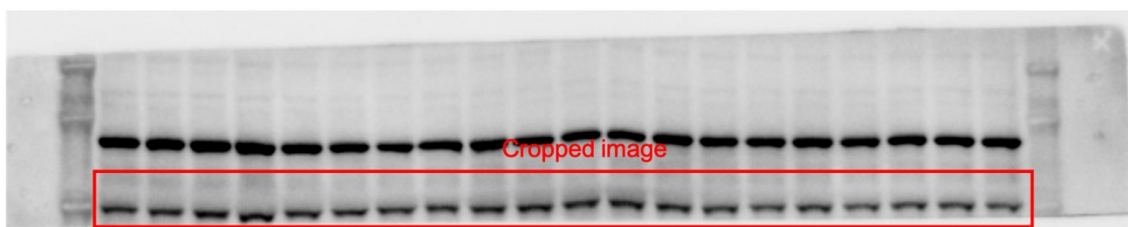

**D. UBE2H**

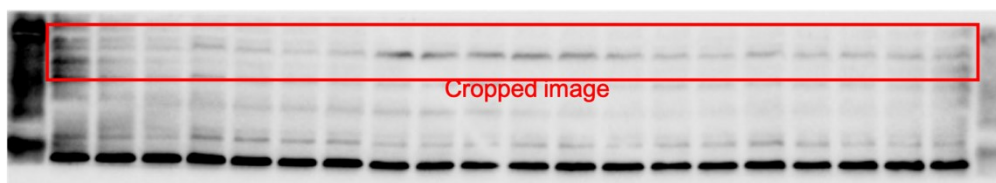

**E. Smad3**

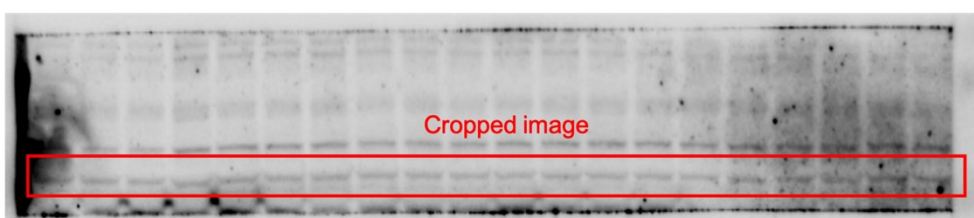

**Figure S2.** Western blot membranes on which the protein labelling has been cropped:  $\beta$ -actin (A), GLUR7 (B), Pi4k2a (C), UBE2H (D), Smad3 (E).
